# Supplementary material for: Overexpression of Medicago MtCDFd1_1 Causes Delayed Flowering in Medicago via Repression of MtFTa1 but Not MtCO-Like Genes
Source: PubMed Central journal article supplement (PMC6761483; doi:10.3389/fpls.2019.01148), 2019-09-19
Supplement: DataSheet_1.pdf [file DataSheet_1.pdf]

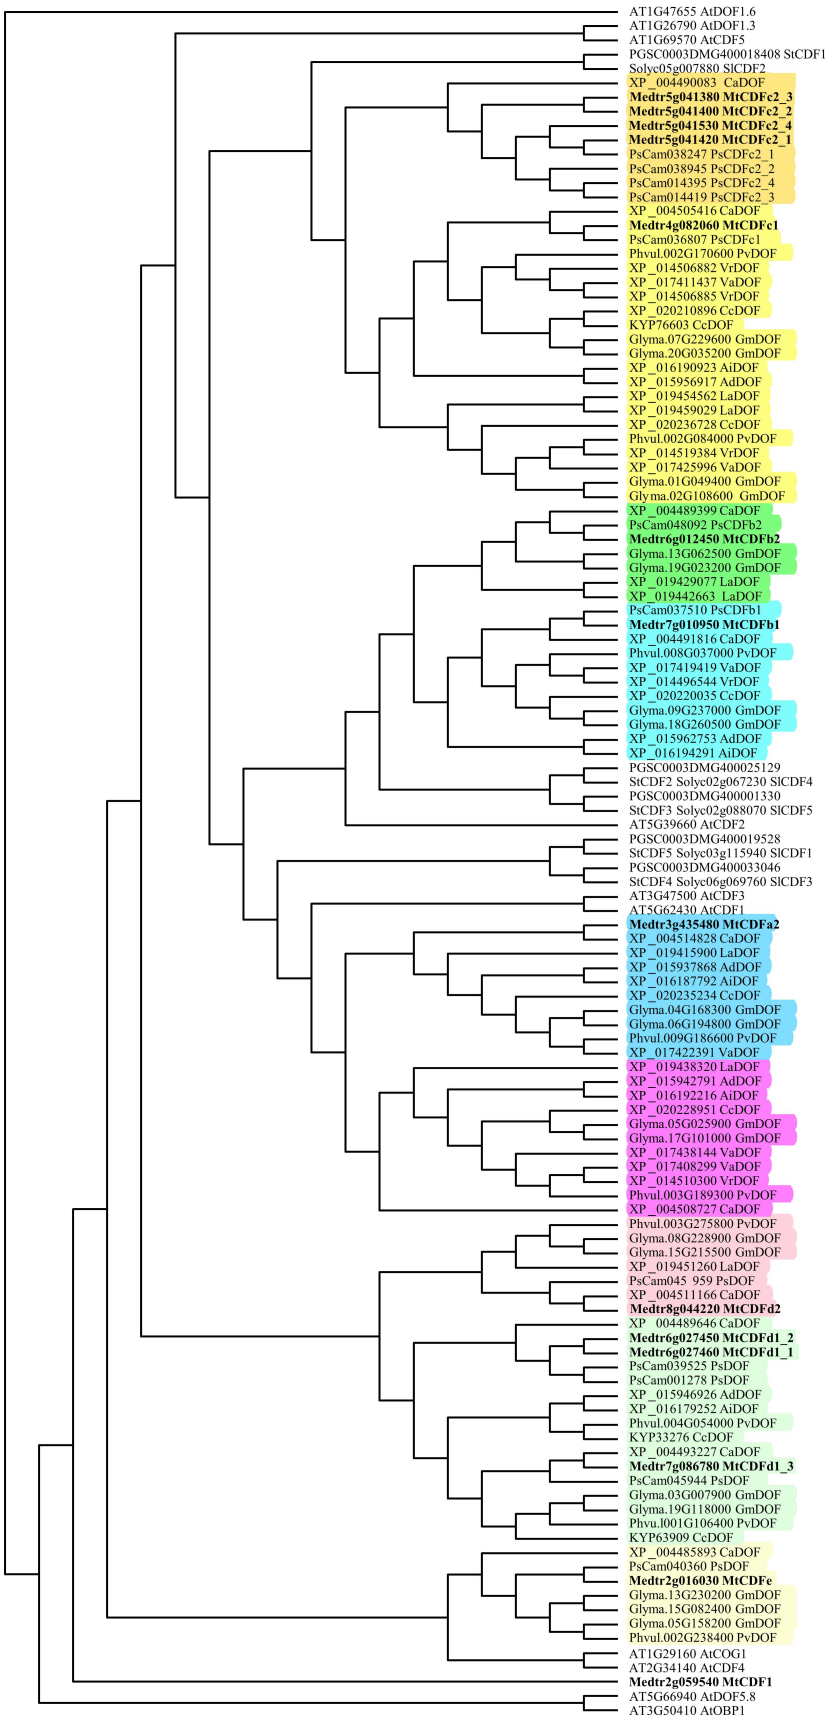

c2

c1

b2

b1

a2

a1

d2

d1

e

**Supplementary Figure S1:** Phylogenetic tree of CDF-like proteins from *Medicago*, other legumes, tomato, potato and Arabidopsis. The tree was constructed with full length amino acid sequences using the neighbour-joining algorithm implemented in PAUP\* (version 4.0). Clades (a-c) of legume proteins have been named as described in Ridge et al. (2016). Additional nomenclature extended to clades d & e. Species included are; Ad - *Arachis duranensis*, Ai - *Arachis ipaensis*, At - *Arabidopsis thaliana*, Ca - *Cicer arietinum*, Cc - *Cajanus cajan*, Gm - *Glycine max*, La - *Lupinus augustifolius*, Mt - *Medicago truncatula*, Ps - *Pisum sativa*, Pv - *Phaseolus vulgaris*, Sl - *Solanum lycopersicum*, St - *Solanum tuberosum*, Va - *Vigna angularis* and Vr - *Vigna radiata*.

AtCDF1 1 4 4 24 30 29 30 39 31 49 59 69 79  
M L E T K D P A K I L L E G R T M K P P P T V L E - - - - - V A D E E E E - - - - -  
AtCDF2 1 4 4 29 30 39 31 49 59 69 79  
M A D P A K I L L E G R T M L P L E L G V D V S S S Y T G - - - - - F L T E T Q I P V R L S D S C T G D D G G G E S I D T K K E E -  
AtCDF3 1 4 4 28 29 31 43 53 63 73  
M M M E T R D P A K I L L E G R T M P P S V F S A V T - - - - - V E D D E E D D W S G - - - - - G D D K S P E K - V T P E L S D K  
AtCDF4 1 4 4 32 33 43 53 63 73  
M A T O D S Q C K I L L E G R T M A F N - - - - - T R T I K N E E E - - - - -  
AtCDF5 1 4 4 32 33 43 53 63 73  
M S K S R D T E K I L L E G R T T S L L D V N C Y D P S S L S P - - - - - V H D V S D P S K E D S S S S S S C S P T I G P I R V P V K K S E Q E S N K F K  
AtCOG1 1 4 4 32 33 43 53 63 73  
M A T O D S Q C K I L L E G R T M T F N A N I - - - - - T O T I K K E E Q - - - - -  
MtCDF1 12 22 32 41 51 61 71 79 86  
M I N N S T I L L E G R T F I T H N I D V S T N D S S E S F - S P L P H E D L S H S L H S S M S S S P L E V N S T E H D A K R Y K E T S R K E L I - - - - - E - D E A S F Q T T  
MtCDFc2\_1 12 22 32 42 50 60 70 80 88  
M I N N S T I L L E G R T F I T H N I D V S T N D S S E S F - S P L P H E D L S H S L H S S M S S S P L E V N S T E H D A K R Y K E T S R K E L I - - - - - E - D E A S F Q T T  
MtCDFc2\_4 12 22 32 42 50 60 70 80 88  
M T N D S T I L L E G R T F Q T H N D V T T N D F S E L E F G S P L R P R D S S D H S P Y S - - S S C S P S E V N S T E H D A K R Y K E T S R K E L T S V O - - - - - E - D E A S F Q T T  
MtCDFb2 1 4 4 32 33 43 53 63 73  
M S E A K D P A K I L L E G R T M P V P E I P T G S G D S I G A P - - - - - S S S G D A V D D G I N Q N H G S F M D E H A I D E T M E D S T K C K E K D A L T Q S S  
MtCDFd1\_1 1 4 4 31 40 50 60 70 80 89  
M N G E G D I C Y K N F S T M L E G R T M P V S D S Q I - - - - - Q A N S T T M I S C S N S K H K G M D P H T Q I I H E S K N S S  
MtCDFb1 1 4 4 31 40 50 60 70 80 89  
M L E T K D P A K I L L E G R T M P I L E V R V G - - D V V V E S - - - - - I D D D H H F S T N S S N E S R N K L E D Q D Q E I E K N T L G E K P S D E K N E - D G I P I Q S T  
MtCDFe 1 4 4 32 33 43 53 63 73  
M A E V R - - - - - K G E I N Q Q I K L F G T T I L K H G E E L K E G E K E S - - - - -  
MtCDFa2 1 4 4 31 32 43 53 63 73 82  
M I E T K D P E K I L L E G R T M L F P G E G E A L M I D G E E - - - - - N V S P A A A M D V E E R D S E S E N E D I E H D E K P E A D K D T E E K E E A D - P P P D A A I -  
MtCDFc1 1 4 4 24 25 36 46 56 66  
M S E V K D P A K I L L E G R T M P L L P L I I - P A N D S S F - - - - - P S S S P P E F T S A I Q H E T E - - - - - E P S R K E L I A Q - D I D E A S Q K T  
MtCDFc2\_3 12 22 30 40 50 60 70 80 89  
M T N D S T I L L E G R T F Q K H N D V P T N D S S - - - - - E F S P L A H E D F S D H S L H S L S S S P L E E N S N I E H D S K R Y K E S R R K E P T S V L D Y - E A S K Q T T  
MtCDFc2\_2 12 22 30 40 50 60 70 80 89  
M T N D S T I L L E G R T F Q R T N - - - - - T D D Y S S - - - - - E F S P L L G H E D F S D H S L H S L S S S S S - - - - - S P N I E H D S K R Y K E S R R K E P T S V L D Y - E A S K Q T T  
MtCDFd1\_2 1 4 4 21 22 33 43 53 63 73  
M N G E G D I C Y K N F S T M L E G R T M P V P E C R I - - - - - O P N S T M N S C S S K H K G N M P H I Q N I H E S K N S S  
MtCDFa1 1 4 4 20 21 31 41 51 61  
M S E T - - - - - Q I D H C M L L E G R T M P V P E C R I - - - - - P P N S G P M D T C S T R K T E A E I P C A E K T Q Q D N S S  
MtCDFd2 1 4 4 24 31 41 51 61  
M F H V K E E Q Q E E K I L L E G R T M Q I H T P I N - - - - - Q T H T T D S Q I H S L P H Q O S I M N G L E E S T N A D V E S V  
PsCDFc1 1 4 4 24 31 41 51 61  
M S E V K D P A K I L L E G R T M P L P L I I S - N D S S S S S - - - - - P S S S P P P Q F I S A I Q H E T E - - - - - E S S R K E L A T A Q - D - D D A S Q Q T G

AtCDF1 35 44 45 55 65 75 85 95  
N Q N - - - - - K T L T D Q S E K D - - - - - K I L L K P I T K I L P C P R C N S M E I T F C Y Y N N Y N V N O P R F E C K A G O R Y W T S G G T M R N V  
AtCDF2 89 99 109 119 129 139 149 159 169 179  
K D S E C Q E E S L R N E S N D V T T T S G T I E K T E T T K A A K T N E E S G G T A C S Q E G K L L K P D K I L P C P R C N S M E I T F C Y Y N N Y N V N O P R F E C K A G O R Y W T A G G T M R N V  
AtCDF3 64 74 81 91 101 111 121 131 141 151  
N N N N C N D N S F N N S K P E T L D K E E - - - - - A T S D Q I E S S D T P E D N Q Q T P D G K T L L K P D K I L P C P R C K S M E I T F C Y Y N N Y N V N O P R F E C K A G O R Y W T A G G T M R N V  
AtCDF4 29 31 39 49 59 69 79 89 99  
- - - - - T H P - - - - - P E Q E A T I A V R S S S S D L T A E K R P D K I L P C P R C K S M E I T F C Y Y N N Y N V N O P R F E C K A G O R Y W T A G G T M R N V  
AtCDF5 83 93 103 113 123 133 143 153 163 173  
D P Y I L S D L N E P P K A V S E I S S P R S S K N Q Q S E I T T T T T S T S G E K S L L K P D K I L P C P R C E S A N I T F C Y Y N N Y N V N O P R F E C R A G O R Y W T A G G T M R N V  
AtCOG1 12 22 32 42 52 62 72 82 92  
- - - - - Q Q Q P P E L Q A T T A V R S P S S - D L T A E K R P D K I L P C P R C K S M E I T F C Y Y N N Y N V N O P R F E C K A G O R Y W T A G G T M R N V  
MtCDF1 102 112 122 132 142 152 162 172 182 192  
M A D G N L F C I E I R D R M K Y T H N Q N N H H H H L A K P C P R C N S F N I T F C Y Y N N Y N V N O P R F E C K A G O R Y W T K G G T I R N V  
MtCDFc2\_1 96 104 114 124 134 144 154 164 174 184 194  
E D S E S P T S S L I E N - - P K T P S S - - - - - I E T E T S Q A N S T K I D E Q T D - M S Q E K S P M K D V I P C P R C K S M D I T F C Y Y N N Y N V N O P R F E C K A G O R Y W T S G G T I R N V  
MtCDFc2\_4 98 106 116 126 136 146 156 166 176 186 196  
E D S K S H T P S S H V E N - - P K S P S S - - - - - I E T E T S E L N S H K I D E Q S D - M S Q E K S P M K D V I P C P R C K S M D I T F C Y Y N N Y N V N O P R F E C K A G O R Y W T S G G T I R N V  
MtCDFb2 102 112 122 132 142 152 162 172 182 192  
E K I T D L D T N S R L V E E S I N P S T E - - - - - D E Q N T L K T S K I M E H - - - - - T E N S H D K T L L K P D K I L P C P R C V S M D I T F C Y Y N N Y N V N O P R F E C K A G O R Y W T A G G T M R N V  
MtCDFd1\_1 62 72 82 92 102 112 122 132 142 152 162 172 182 192  
N - - - - - E I N E S K V N T S I V E D N V E T S S T D Q D K L L K P D K I L P C P R C K S F D I T F C Y Y N N Y N V N O P R F E C R A G O R Y W T I N G G T M R N V  
MtCDFb1 89 99 109 119 129 139 149 159 169 179 189 199  
E E F T N P D A A S R T D E E S I T V S T E - - - - - R K A A T L K T S K T E E E Q D E T S N S D W K L L K P D K I L P C P R C N S M D I T F C Y Y N N Y N V N O P R F E C K A G O R Y W T A G G T M R N V  
MtCDFe 102 112 122 132 142 152 162 172 182 192  
- - - - - E D O T V E K I I E K I I P C P R C K S M E I T F C Y Y N N Y N V N O P R F E C K A G O R Y W T A G G T M R N V  
MtCDFa2 92 102 112 122 132 142 152 162 172 182 192  
K N N N S A A L L P E G N P K T P S I D E - - - - - I E T S K S E N E Q S E T T A N N N D - - - - - T Q E T L L K P D K I L P C P R C N S A D I T F C Y Y N N Y N V N O P R F E C K A G O R Y W T A G G T M R N V  
MtCDFc1 99 109 119 129 139 149 159 169 179 189 199  
E D L R A L T T S V V H E N P P K T P S A - - - - - I E T N S L L K S S T N V E Q S E T S V S E I K T L L K P D K I L P C P R C N S M D I T F C Y Y N N Y N V N O P R F E C K A G O R Y W T A G G T M R N V  
MtCDFc2\_3 99 109 119 129 139 149 159 169 179 189 199  
E D L N I P T T - - - - - I E T S L Q N S T K I D E Q S D - M S Q E K S A P N K - - - - - I L P C P R C K S M D I T F C Y Y N N Y N V N O P R F E C K A G O R Y W T S G G T I R N V  
MtCDFc2\_2 91 101 111 121 131 141 151 161 171 181 191  
E D L N T P T T S - - - - - I E T K T S Q L N S T K V D E Q S D - I S Q D K A P N K - - - - - I L P C P R C K S M D I T F C Y Y N N Y N V N O P R F E C K A G O R Y W T A G G T I R N V  
MtCDFd1\_2 55 65 75 85 95 105 115 125 135 145 155 165 175 185 195  
N - - - - - E I N E S K V N T S T V E D N M E T S S T D Q D K L L K P D K I L P C P R C N S F D I T F C Y Y N N Y N V N O P R F E C R A G O R Y W T A G G T M R N V  
MtCDFd1\_3 67 77 87 97 107 117 127 137 147 157 167 177 187 197  
D S M D S K O E S I - - - - - Q E K E P I V N S K P T E D T T E T - T D Q D K L L K P D K I L P C P R C N S M D I T F C Y Y N N Y N V N O P R F E C K A G O R Y W T A G G T M R N V  
MtCDFd2 71 81 91 101 111 121 131 141 151 161 171 181 191  
S K Q V N P Q E D A N A I N P M Y T G T L K P - - - - - V T K A V H R T N E H K T A K R D T D N Q E K V F R K P D K I L P C P R C N S L E I T F C Y Y N N Y N V N O P R F E C K A G O R Y W T A G G V I R N V  
PsCDFc1 76 86 96 106 116 126 136 146 156 166 176 186 196  
E D L K S L A A S S A I L E N S P T P S G - - - - - I E T N S L P K A S T N G E Q S E T S V S E D K T L L K P D K I L P C P R C N S M D I T F C Y Y N N Y N V N O P R F E C K A G O R Y W T A G G T M R N V

AtCDF1 105 120 121 129  
P I L G A G R R K N N N S P T S H Y H V T I - - - - - E T N G P M S I E - - - - -  
AtCDF2 161 169 185 186 191 201 212 223 237  
P M G A G R R K N S P A S H Y N R H V S I T S A E A M Q K - - - - - V A R T D L Q H P N G A N I T F E G S D S V L C E S - - - - -  
AtCDF3 112 113 124 124  
P M G A G R R K N S S S S H Y R H I T I S E A L E A A R L D P - - - - - G L Q A N T R I G L E A Q Q Q H V A A P M T P V - - - - - M  
AtCDF4 183 197 198 212 214  
P M G A G R R K N P G R V - - - - - V V G M I G D G - - - - -  
AtCDF5 183 197 198 212 214  
P M G S G R R K N Q W P S S N H Y L Q V T - - - - - S E D C D N N S G T I S I E - - - - -  
AtCOG1 87 117 124 212 214  
P M G A G R R K N P G R V G G F A E I L G A A - - - - -  
MtCDF1 87 195 196 207 217  
P M G G S G R K N K S K S K - - - - - F N S D A S H Y H Q M S T M T F E G S D S P - - - - -  
MtCDFc2\_1 183 195 196 203 213 213  
L I L G A G R R K N L N - - - - - A A N G L H S T I L L T F E G S D S P - - - - -  
MtCDFb2 187 197 215 225 235 245 255 265  
P M G A G R R K N S A S H F R Q I T V P E T A V Q N S L D S P N - - - - - G V H H P S L N C N G M F T E R T D T P L C E S M A L N A D Q G V N I S Q K N G F I R P E A L R I H  
MtCDFd1\_1 186 196 208 209 217 227 237 247 257  
A M G A G R R K N H I A S Q Y R H I V A S D G I P T A S L E T N D S S R Y Q H G S N L E S A A V F R C S N D N G V L K F G R E N A S L D E S - - - - -  
MtCDFb1 186 196 208 209 217 227 237 247 257  
P M G A G R R K N S S S S H Y R Q I T V S E A T L Q N S R - - - - - H P S V K C N G T I L L T F E G S N S P C E S M A S V L K H A D K T M Q N Y T R N G Y H K H E E L R I C  
MtCDFe 187 196 206 214 232  
P M G A G R R K A K - - - - - P P G - - - - - H E D S - - - - -  
MtCDFa2 187 196 206 214 232  
P M G A G R R K N N - N S S S H Y R H I T I S E A L D A A R I I S P - - - - - N G T H L L Q N L K T N R N I F E G - - - - -  
MtCDFc1 183 184 195 205 215 222 232 243 244 248  
P M G A G R R K N N L S T S H Y R H L I I P E G A K L N S P N G I H S L G N G - A A V L T F D S N P P L C N T M A S V I N I A E R T O N C V S N G F H H A S - - - - - S Y G G E N D H  
MtCDFc2\_3 183 184 195 205 215 222 232 243 244 248  
L V G A G R R K N I S S - - - - - L S S D A S H N C O M S T V I T F E G S D S P - - - - -  
MtCDFc2\_2 140 150 160 170 183 196  
P M G A G R R K N S S - - - - - F S S D A S H N R Q M S V I T F E G S D S P - - - - -  
MtCDFd1\_2 140 150 160 170 183 196  
P I L G A G R R K N I A S Q Y R H I V A S G G I S T S N F S E N D S S - - - - - T E S A A V F R C S N N N G V L K F G P E N E S N D - - - - -  
MtCDFd1\_3 169 179 196 197 205 215 203 163  
P I L G A G R R K N H L A S Q Y R Q I V T T N G I P T R L E S T N S S - - - - - D H H H T S T D N E V L K E G P D T P L C E S - - - - -  
MtCDFd2 169 183 193 201 207 217 227 237 242 249  
P I L G A G R R N N O S P L Q N C Q P V P T L D A V P V I H I D S K E - - - - - E V P L S E S V E V N L K G H R K - - - - -  
PsCDFc1 173 183 193 201 207 217 227 237 242 249  
P M G A G R R K N T S P A H Y R H L M I P E G V K V H S P N G L H - - - - - G S V L A F D S D S P L C N T M T S V L K I G E R V P N C V P N G F H Q A T G P N - - - - - T F V S Y S G E D D H



AtCDF1 136 143 158 159 169 177 181  
SLGGDQKVVSS--NR143--NQKLVARIENDDRS259 273 274 278 280 288 290 298 308  
AtCDF2 ---MAGSLNLVEKSLKTKTQVLQEPNEGLKITVPLNQTN---E EAGTVSPLKGNPCF288 290 298 308  
AtCDF3 LKQEDQKLVNAGARRNFIQLADQRLVARFVENGDDCSSG5255VTTSSNNH5VDESRAQSGSVVEAQMNNNNNNNNNYACI290 298 307  
AtCDF4 ---NGVRQVELINGLLVEEQHAAAHAAGSFRHDF244 245 255 265  
AtCDF5 ---GSSSEISVTEITGKHGSDGATKISADSVSQENK162 163 171 171  
AtCOG1 ---TGAVDQVELDALLVEEVR--AATASHGGRHDF119 120 135  
MtcDF1 ---TASSSISIPSSAAATTPTLQPADKSDSHSN5D249 250 259 267  
MtcDFc2\_1 ---IMSSSILDKKGNVGSLEKTFDKSYQS-FPQQLP245 246 257 263  
MtcDFc2\_4 ---SMSSTSLDKKVNVAHEETFDKSYQS-FPQP245 246 257 263  
MtcDFb2 VPYVGEFKSDEHSIKSSDSTLTLEDAAASSVEQVMPNCSQFQPVYPPS-APWLLPWSQSQSVQVQPPAFFPQGF276 276 276 276  
MtcDFb1\_1 ---KGSMLNLMNRRRHVDASGNNCRENGEETSLSVCSVTNGHTRG---NELFSEONRSKPMOSYPASS344 344  
MtcDFb1 VPHTSEQGEDQNSKSVSTSTKSTEGATTNVSQEQAMNDH5FFPQGGYFPHGTWHLWPNVQMS5PI-PPAFPCP276 276 276 276  
MtcDFe ---GSPESICLYEAAASDDG---HNYLG277 277 282 292  
MtcDFa2 ---LDHPHLYDSMNSDPAEAKKVLNDRNRGFRSASVTVSKSMF---ESGKNMTQESLPQKNNGFIQPCPT296 296 296 296  
MtcDFc1 SIGVSTASNRSERKSHSTNG-LVDKGVGE-FPPLQHIPSPFLPY---TWN5AMPPTFC296 296 296 296  
MtcDFc2\_3 ---VMSSTSLAKKKNVGSNDNETFD225NQCFPPQF238 239 250 256  
MtcDFc2\_2 ---VMSSTSLATKMNVDGDEISDKSNQCFPPQF238 239 250 256  
MtcDFd1\_1 ---SIFPNPNHNRKRVDAANNCRENGEETSSLLCSLTLNGYTRG---NELSEEHNRSKPQNSYASS344 344  
MtcDFd1\_2 ---MESMLHLRDQKRNDANANSVQHR-EDPSLKGSSVTNTGNQ---NEVSS-EHNASNWKOCYQVSP264 264  
MtcDFd2 ---LEMDSSTVKVEDIENS5SSVRAEASEGEMEYS5EGIEHVGLT297 297 297 297  
PsCDFc1 SIGVSVATSIISERKCHTDTNG-SMDKRLG-FPPRLQYVPSPLLPY---PWNSGIPPTFC296 296 296 296

AtCDF1 185 190 199 204 205 214 220 232 242  
---VYP---YMLMPLTSSPV---SSSPSS---TLGKHHSRDE---DETVKV---KORNGSVLVPKILRIDDPNEAAKSSSIW  
AtCDF2 P---A---YMSCPGVSPGAWNSFTWMPQPNSSPSGNSPNSF---TLGKHHSRDEENAEAPGTAFDETESLGREKSKPERCLWLPKILRIDDPNEAAKSSSIW  
AtCDF3 PGYMPFPYP---YMLTIPMLPPHQ---SSSPISQKCSNTNSF---TLGKHPRDDESSKKNDETER---KQKAGCVLVPKILRIDDPNEAAKSSSIW  
AtCDF4 ---GSSC---170 200  
AtCDF5 280 281 291 292 297 307 317 329 337  
F---YMGCTVPIYPT---SETSSCLLKRDRQTEGRINDTNT---ITTRARLWSESLRMMN---IEASKSAVV  
AtCOG1 ---GSSC---172 175  
MtcDF1 ---GSSC---136 147  
MtcDFc2\_1 274 275 282 283 299  
---MSMQSLSIT---QFDEPNKLTGKHHSRDEG---292 300 308 318 328  
MtcDFc2\_4 270 271 277 278 282 292 300 308 318 328  
---MNIQSCGL---QNSTTLGKHHSRDEGNLLHKSSE---KEKLGSERCNKRVLIPKILRIDDPNEIAKSSSIW  
MtcDFb2 364 365 376 380 390 400 409 416 426 436  
G---ALNPNWLAQPS---SPNSATVNSGNS---TLGKHHSRDE301 311 311 331 341  
MtcDFb1\_1 356 357 368 372 382 392 401 406 416 426  
S---ANNIPRQAQPS---SPNGAHDSTPNSF---TLGKHHSRDENDMLKSSSEGDG---KKE---ISEEKSVPKILRIDDPNEIAKSSSIW  
MtcDFe ---KRRR145  
MtcDFa2 PGFPM5FYAP---FMNPPWPFPHPT---ATTPRS5---TLGKHHSRDEDDNTDENAKQDSLQTEESPKQRNGSVLVPKILRIDDPTEAAKSSSIW  
MtcDFc1 P---MNIIPCISPGS---ASVNSD5SAH5SVF---TLGKHHSRDEGNLITSVNSPKE---KPETEHNSTGCVLIPKILRIDDPNEIAKSSSIW  
MtcDFc2\_3 263 264 271 272 288 289 297 307 317  
---MNIQSCGL---QNSTTLGKHHSRDEG---LENNKESDNN5SVLIPKILRIDDPNEIAKSSSIW  
MtcDFc2\_2 255 256 263 264 272 284 281 289 301 311 321  
---MNIQSCGL---QNSTTLGKHHSRDEG---LENNKESDNN5SVLIPKILRIDDPNEIAKSSSIW  
MtcDFd1\_1 259 259 268 273 283 293 298 308 318 318  
---MNIPLNQLN---NVTSMQSSMQMCHPYGVDPS5MQWCHMP---NIGLQFVPESEKNGSV5IGSNCCIIS  
MtcDFd1\_2 332 332 330 330 330 330 330 330 330 330  
---MNIPLNQLN---NVTSMQSSMQMCHPYGVDPS5MQWCHMP---NIGLQFVPESEKNGSV5IGSNCCIIS  
MtcDFd2 303 313 323 333 343 353 363 373 383 393  
ATMTMTEVPMPTPSYMGMPN5VWGQMEELSLVGSFAFNGIPSS5F---TLGKHCRDGS5TEEDIMKPN---IIPKILRIDDPNEIAKSSSIW  
PsCDFc1 330 331 341 345 354 364 372 378 388 398  
P---MNIIPCISPN5---PSVNTQD5PQ5S---TLGKHHSRDEGNLITSVNSP---DKEHNCST5SVLTPKILRIDDPNEIAKSSSIW

AtCDF1 252 260 266 276 285 297  
TTLGKIKNE--VMFNGEFGSSK---EIVKLSNKEET-SLVLIKANPAALSRSLNFIHQ  
AtCDF2 407 416 426 436 445 457  
ETTLGKIKNE-NADTFGAFR5SSTKEKLS5EGRLPGR-RPELIQANPAALSRSLNFIHQ  
AtCDF3 399 407 417 427 436 448  
TTLGKIKNE--AMCKAGMEKEDHKTMYNNDKAEN-SPVLIKANPAALSRSLNFIHQ  
AtCDF4 ---GSSC---170 200  
AtCDF5 SKLPTKPE---KKTQGF5LENGEDTKGNSNRSS5LVS5ETSHTLIQANPAAMSRAMNREIR5SMQ  
AtCOG1 ---GSSC---172 175  
MtcDF1 157 167 177 187 197 206  
VVQGD5V5MLNHQOFSNEEG5LDWIEGGANTVDQ5YWTQSHWSDIIVH5SS5L5HLP  
MtcDFc2\_1 ---RUSKGFAS351 361  
MtcDFc2\_4 338 341 351 361 369 377 385 395 405  
STLGLKKN---GEL5EMGF5ASKGGVKNHVQTS---SVLIQANPAALSRSLVIEHRI  
MtcDFb2 446 456 466 475 483 495  
TTLGKIKNDKADAIRGGLEKAFAS5SNEK-DSVQN---SPAMQANPAAMSRSLI5FIHETS  
MtcDFb1\_1 355 358 368 466 474 486  
PSSST5NSCISVNGTPI5LGKHT456 466 474 486  
MtcDFb1 TTLGKIKNNAD5VPPRRL5QA5F5K5CDEKNHLVQV---SVLIQANPAALSRSLI5FIHETS  
MtcDFe ---KSSGYS5LA---SS5L161  
MtcDFa2 419 427 434 444 453 465  
ETLGLKKN---GLSRG-GMTKAF---QSKKDGKNHVQT-SPMLIMANPAALARS5LNFIHNS  
MtcDFc1 415 425 435 445 453 465  
SKLGNNDKANS5LNGGEMNGE5QSKDMNHSVGT-SPMLIYANPAALSR5RTIHE  
MtcDFc2\_3 327 330 340 350 359 371  
TTLGKIKN---GGLENGE5AS5VGDNRNHVEAD-5SVLIKANPAALSR5FVIRMI  
MtcDFc2\_2 319 322 332 342 351 363  
LTLGLKKN---GGRF5NGE5ASTGGDKNHVVEAN-SLAIKANPAALSR5LVIHRI  
MtcDFd1\_2 P5SST5S  
MtcDFd1\_3 P5SST5S  
MtcDFd2 399 409 419 429 439 449 459 469 479 489  
SLTRTKSEONKPI5MKS5EKS5IEPK5NAS5RDLDDN---OILIRANPAALSR5G5K5SV  
PsCDFc1 SKLGI5SNDK5TNS5LNG5M5NA5F5Q5K5GDK5TNH5A5EA---SP5LMI5ANPAAL5SR5RTI5H5GT

**Supplementary Figure S2:** Alignment of Medicago, Arabidopsis and pea CDF protein sequences showing the highly conserved DOF domain (green box) present in all the proteins and three other domains present in most of the CDF proteins, the N-terminal TOPLESS (TPL) interacting domain (red box) and two C-terminal domains, a putative GI-interacting domain (yellow box) and a FKF1-interacting region (blue).

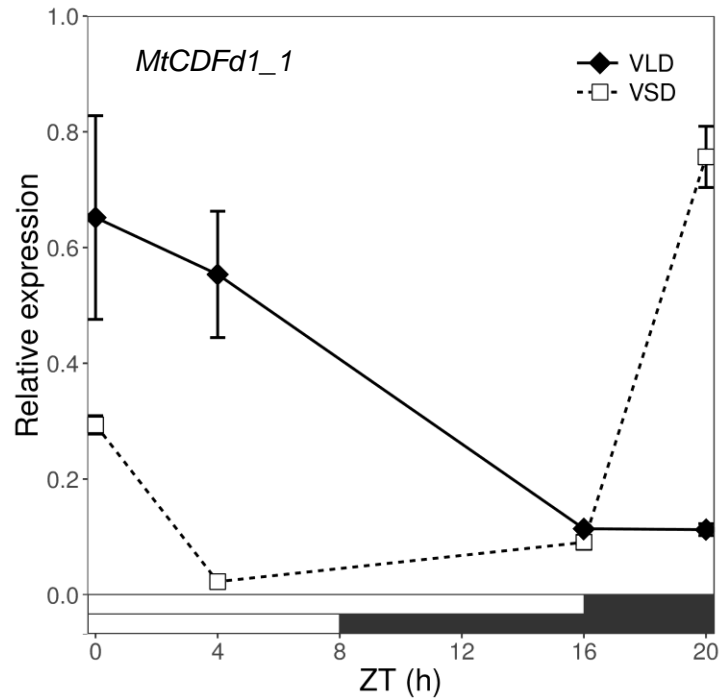

**Supplementary Figure S3.** *MtCDFd1\_1* gene transcript levels have a diurnal cycle. Gene expression of *MtCDFd1\_1* in a Jester diurnal time course in VSD and VLD. Results are presented as averages  $\pm$  SE of three biological replicates at each time point and normalised to *Medicago PROTEIN PHOSPHATASE 2A (PP2A)*. Data are presented relative to the highest value observed overall. Bars underneath each graph show the length of light and dark conditions for LD (16 h light/8 h dark; upper) and SD (8 h light/16 dark; lower). ZT (zeitgeber time) indicates hours after dawn.

Each replicate consists of two fully-expanded trifoliolate leaves from vernalised (V) wild type Jester plants grown in SD or LD.

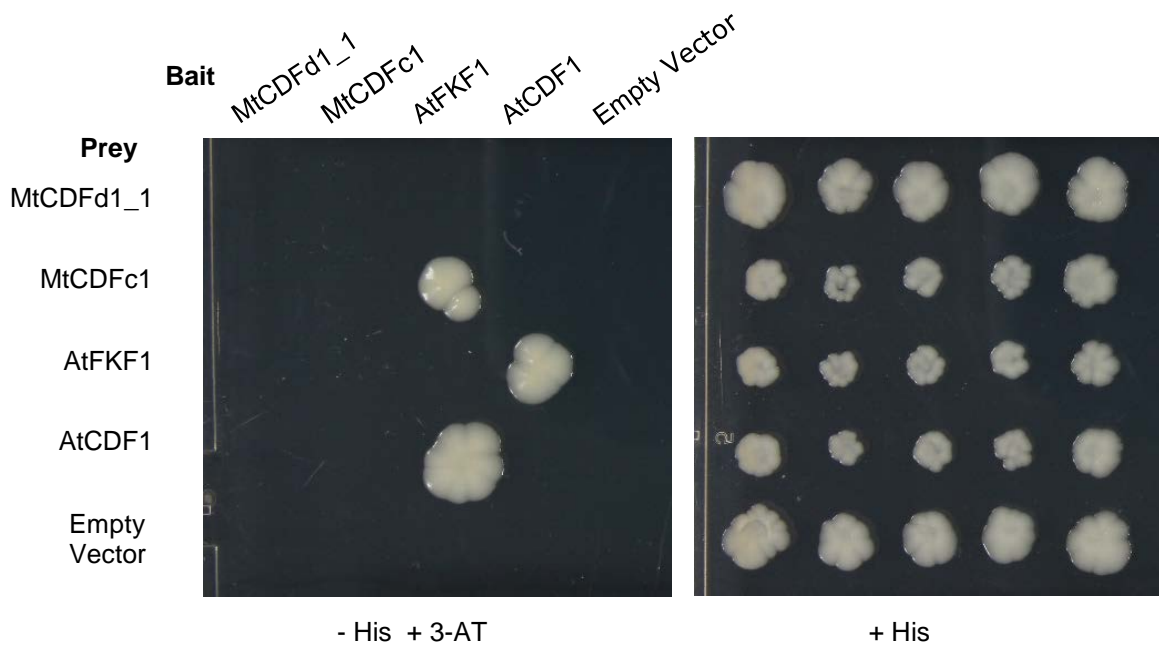

**Supplementary Figure S4.** *MtCDFd1\_1* does not interact with AtFKF1 in yeast two hybrid assays. **(B)** Diploid yeast colonies containing prey and bait constructs from *MtCDFd1\_1*, *MtCDFc1*, AtCDF1 and FKF1 or empty vector controls, were grown on medium selecting for protein-protein interactions, lacking His with 2mM 3-AT (left) or on medium with His (right). Colonies were allowed to develop over 11 days at 28°C. The vectors were pDEST22 (prey vector with the GAL4 activation domain) and pDEST32 (bait vector with GAL4 binding domain). Vectors containing inserts encoding full length CDF proteins were tested while the fragment encoding the KELCH-repeat region of AtFKF1 (amino acids 284 to 619) was used. The positive control interaction was between AtCDF1 and AtFKF1; AtCDF1, as either bait or prey, interacted with AtFKF1 (Imaizumi et al., 2005; Ridge et al., 2016). One of the Medicago CDFs, *MtCDFc1* interacted with AtFKF1 only in one direction, when it was the prey. However, as predicted from the lack of conservation of the C-terminal domains with predicted GI and FKF1 binding functions, there was no evidence of interaction between *MtCDFd1\_1* and AtFKF1. Similar results were obtained with a second experiment using independent colonies.

**Supplementary Table S1: Summary of the results of screening of *MtCDF Tnt1* insertion mutants.**

| Medicago gene ID <sup>1</sup> | Gene Names <sup>2</sup>     | Thomson et al. Nomenclature <sup>4</sup> | <i>Tnt1</i> line | <i>Tnt1</i> position | Fl. time LD <sup>*</sup> |                        | Fl. time VLD <sup>*</sup> |                       | Fl. time VSD <sup>*</sup> |                        | Gene expression KD/KO <sup>*</sup> |    |
|-------------------------------|-----------------------------|------------------------------------------|------------------|----------------------|--------------------------|------------------------|---------------------------|-----------------------|---------------------------|------------------------|------------------------------------|----|
|                               |                             |                                          |                  |                      | Days                     | Nodes                  | Days                      | Nodes                 | Days                      | Nodes                  |                                    |    |
| <i>Medtr2g059540</i>          | <i>CDF1</i> <sup>3</sup>    | <i>CDF1</i>                              | NF9016           | exon 1               | 65.1±1.49                | 17.6±0.28              | 23.1±0.61                 | 8.4±0.51              | 63.1±4.00                 | 13.8±0.81              | yes                                |    |
| <i>Medtr5g041420</i>          | <i>CDFc2_1</i>              | <i>CDF2</i>                              | NF13527          | exon 2               | 62.4±0.75                | 17.1±0.61              | 25.9±0.77                 | 9.1±0.36              | 63.1±1.42                 | 13.3±0.57              | yes                                |    |
| <i>Medtr5g041530</i>          | <i>CDFc2_4</i>              | <i>CDF3</i>                              | NF21008          | exon 2               | nd                       | nd                     | 28.7±1.84                 | 8.8±1.23              | 69.4±0.70                 | 14.4±0.43              | yes                                |    |
| <i>Medtr6g012450</i>          | <i>CDFb2</i>                | <i>CDF4</i>                              | NF21606          | exon 2               | 65.9±0.80                | 18.3±0.41              | 21.5±0.76                 | 7.7±0.68              | 52.6±1.63                 | 12.8±0.33              | yes                                |    |
|                               |                             |                                          | NF0134           | no <i>Tnt1</i>       | na                       | na                     | na                        | na                    | na                        | na                     | na                                 | na |
|                               |                             |                                          | NF10121          | no <i>Tnt1</i>       | na                       | na                     | na                        | na                    | na                        | na                     | na                                 | na |
| <i>Medtr6g027460</i>          | <i>CDFd1_1</i> <sup>3</sup> | <i>CDF5</i>                              | NF11690          | intron 1             | 61.8±0.87                | 16.8±0.36              | 24.4±1.17                 | 8.6±0.44              | nd                        | nd                     | no                                 |    |
|                               |                             |                                          | NF9161           | no <i>Tnt1</i>       | na                       | na                     | na                        | na                    | na                        | na                     | na                                 | na |
|                               |                             |                                          | NF9868           | exon 2               | nd                       | nd                     | 19.0±1.15                 | 6.0±0.00              | nd                        | nd                     | yes                                |    |
| <i>Medtr7g010950</i>          | <i>CDFb1</i>                | <i>CDF6</i>                              | NF20445          | no <i>Tnt1</i>       | na                       | na                     | na                        | na                    | na                        | na                     | na                                 |    |
|                               |                             |                                          | NF6504           | intron 1             | nd                       | nd                     | 20.5±6.35                 | 7.0±0.00              | nd                        | nd                     | no                                 |    |
|                               |                             |                                          | NF14323          | intron 1             | 63.5±2.76                | 17.2±0.81              | 22.3±1.22                 | 8.1±0.42              | nd                        | nd                     | no                                 |    |
| <i>Medtr2g016030</i>          | <i>CDFe</i> <sup>3</sup>    | <i>CDFa</i>                              | NF13712          | no <i>Tnt1</i>       | na                       | na                     | na                        | na                    | na                        | na                     | na                                 |    |
|                               |                             |                                          | NF7191           | exon 1               | 58.7±2.63                | 16.4±0.54              | 28.3±1.59                 | 9.9±0.43              | 69.5±0.77                 | 14.4±0.63              | yes                                |    |
| <i>Medtr3g435480</i>          | <i>CDFa2</i>                | <i>CDFb</i>                              | NF16323          | no <i>Tnt1</i>       | na                       | na                     | na                        | na                    | na                        | na                     | na                                 |    |
|                               |                             |                                          | NF9123           | exon 2               | 66.1±2.14                | 18.2±0.56              | 27.9±0.83                 | 10.5±0.34             | 68.0±0.99                 | 13.6±0.46              | yes                                |    |
| <i>Medtr4g082060</i>          | <i>CDFc1</i>                | <i>CDFc</i>                              | NF11050          | exon 2               | nd                       | nd                     | 30.2±2.50                 | 11.1±0.83             | nd                        | nd                     | yes                                |    |
|                               |                             |                                          | NF1963           | no <i>Tnt1</i>       | na                       | na                     | na                        | na                    | na                        | na                     | na                                 | na |
| <i>Medtr5g041380</i>          | <i>CDFc2_3</i>              | <i>CDFd</i>                              | NF14291          | exon 2               | 55.3±2.42                | 17.2±0.67              | 23.6±1.30                 | 8.5±0.70              | 65.5±0.78                 | 14.0±0.40              | yes                                |    |
|                               |                             |                                          | NF2921           | no <i>Tnt1</i>       | na                       | na                     | na                        | na                    | na                        | na                     | na                                 | na |
| <i>Medtr5g041400</i>          | <i>CDFc2_2</i>              | <i>CDFe</i>                              | NF4354           | exon 1               | 64.1±2.31                | 16.4±0.80              | 27.7±0.89                 | 10.4±0.39             | 59.5±0.98                 | 12.9±0.38              | yes                                |    |
|                               |                             |                                          | NF11400          | exon 1               | 59.9±3.13                | 16.3±0.64              | 28.7±1.59                 | 10.7±0.83             | 60.2±0.82                 | 13.9±0.47              | yes                                |    |
| <i>Medtr6g027450</i>          | <i>CDFd1_2</i> <sup>3</sup> | <i>CDFf</i>                              | NF17470          | exon 2               | nd                       | nd                     | 21.6±0.73                 | 7.4±0.60              | nd                        | nd                     | yes                                |    |
|                               |                             |                                          | NF1515           | exon 2               | nd                       | nd                     | 20.1±0.98                 | 7.2±0.64              | nd                        | nd                     | nd                                 |    |
| <i>Medtr7g086780</i>          | <i>CDFd1_3</i> <sup>3</sup> | <i>CDFg</i>                              | NF19175          | exon 2               | 63.4±4.66                | 17.5±1.61              | 22.3±1.07                 | 7.8±0.30              | 61.1±5.08                 | 13.6±0.73              | yes                                |    |
|                               |                             |                                          | NF11642          | exon 2               | 57.3±1.99                | 16.1±0.46              | 24.1±0.45                 | 8.8±0.32              | 59.9±0.77                 | 13.9±0.34              | yes                                |    |
| <i>Medtr8g044220</i>          | <i>CDFd2</i> <sup>3</sup>   | <i>CDFh</i>                              | NF21417          | exon 2               | nd                       | nd                     | 20.9±1.36                 | 6.8±0.64              | nd                        | nd                     | nd                                 |    |
| R108 WT                       |                             |                                          |                  |                      | 58.0±0.78 <sup>a</sup>   | 15.5±0.34 <sup>a</sup> | 23.9±0.59 <sup>c</sup>    | 8.5±0.30 <sup>c</sup> | 58.7±1.00 <sup>g</sup>    | 13.0±0.36 <sup>g</sup> |                                    |    |
|                               |                             |                                          |                  |                      | 54.4±0.75 <sup>b</sup>   | 16.0±0.26 <sup>b</sup> | 22.7±0.96 <sup>d</sup>    | 7.6±0.48 <sup>d</sup> | 69.5±0.58 <sup>h</sup>    | 13.4±0.40 <sup>h</sup> |                                    |    |
|                               |                             |                                          |                  |                      |                          |                        | 26.1±0.65 <sup>e</sup>    | 8.6±0.40 <sup>e</sup> | 63.3±1.34 <sup>i</sup>    | 12.9±0.42 <sup>i</sup> |                                    |    |
|                               |                             |                                          |                  |                      |                          |                        | 24.5±0.68 <sup>f</sup>    | 8.2±0.42 <sup>f</sup> |                           |                        |                                    |    |

Fl., flowering; WT, wild type; nd, not done; na, not applicable; KD/KO, knock-down/knock-out

<sup>1</sup> Medicago gene identifiers from JCVI Medicago genome Mt4.0, <http://www.jcvi.org/medicago/>

<sup>2</sup> Gene names based on nomenclature from Ridge et al. 2016; <sup>3</sup> Additional extended nomenclature based on clades seen in Supplementary Figure 1

<sup>4</sup> Nomenclature from Thomson et al. 2019

\* Based on qRT-PCR and/or full length cDNA amplification

+ Values expressed as means ± 95% confidence intervals

<sup>a</sup> Same batch as NF9016, NF13527, NF21606, NF11690 and NF14323 in LD; <sup>b</sup> same batch as NF7191, NF9123, NF14291, NF4354, NF11400, NF19175 and NF11642 in LD; <sup>c</sup> same batch as NF9016, NF13527, NF21008, NF21606, NF11690 and NF14323 in VLD; <sup>d</sup> same batch as NF9868 and NF6504; <sup>e</sup> same batch as NF7191, NF9123, NF11050, NF14291, NF4354, NF11400, NF17470 and NF11642 in VLD; <sup>f</sup> same batch as NF1515, NF19175 and NF21417 in VLD; <sup>g</sup> same batch as NF9016, NF13527, NF21008 and NF21606 in VSD; <sup>h</sup> same batch as NF7191, NF9123 and NF14291 in VSD; <sup>i</sup> same batch as NF4354, NF11400, NF19175 and NF11642 in VSD



**Supplementary Table S2: Primers used in this study**

| Primer name                      | Primer sequence                                          | Primer used for |         |
|----------------------------------|----------------------------------------------------------|-----------------|---------|
| GW_Medtr2g059540-F (MtCDF1)      | GGGGACAAGTTTGTACAAAAAAGCAGGCTATGGCAGATGGAAATCTTTTCTG     | Gateway cloning |         |
| GW_Medtr2g059540-R (MtCDF1)      | GGGGACCACTTTGTACAAGAAAGCTGGGTTCATGGAAGATGAAAAAGAGAGGA    |                 |         |
| GW_Medtr5g041420-F (MtCDFc2_1)   | GGGGACAAGTTTGTACAAAAAAGCAGGCTATGATTAATAATTCAACCATAACGCTT |                 |         |
| GW_Medtr5g041420-R (MtCDFc2_1)   | GGGGACCACTTTGTACAAGAAAGCTGGGTGCCTTCAAACCAAGGTGTC         |                 |         |
| GW_Medtr5g041530-F (MtCDFc2_4)   | GGGGACAAGTTTGTACAAAAAAGCAGGCTAGCAAAAACCTACCTGAGATGACT    |                 |         |
| GW_Medtr5g041530-R (MtCDFc2_4)   | GGGGACCACTTTGTACAAGAAAGCTGGGTACACCGGACACACCTTCAAA        |                 |         |
| GW_Medtr6g012450-F (MtCDFb2)     | GGGGACAAGTTTGTACAAAAAAGCAGGCTATGTCTGAAGCAAAAGACCCTG      |                 |         |
| GW_Medtr6g012450-R (MtCDFb2)     | GGGGACCACTTTGTACAAGAAAGCTGGGTTGCTGTGTCAATCGGCTCAT        |                 |         |
| GW_Medtr6g027460-F (MtCDFd1_1)   | GGGGACAAGTTTGTACAAAAAAGCAGGCTCACAAAAATGAATGGTGAAGGTGAC   |                 |         |
| GW_Medtr6g027460-R (MtCDFd1_1)   | GGGGACCACTTTGTACAAGAAAGCTGGGTACAGAATCTCATGTGTGTTTGCC     |                 |         |
| GW_Medtr7g010950-F (MtCDFb1)     | GGGGACAAGTTTGTACAAAAAAGCAGGCTCTGTTTTAGCAACAAAAATGTTGGA   |                 |         |
| GW_Medtr7g010950-R (MtCDFb1)     | GGGGACCACTTTGTACAAGAAAGCTGGGTGGTTGAACACGGCCAAATCA        |                 |         |
| GW_Medtr2g016030-F (MtCDFe)      | GGGGACAAGTTTGTACAAAAAAGCAGGCTAATATGGCTGAAGTGAGAAAAGGTG   |                 |         |
| GW_Medtr2g016030-R (MtCDFe)      | GGGGACCACTTTGTACAAGAAAGCTGGGTACAAGAAATCACAAGGAGGATGCTA   |                 |         |
| GW_Medtr3g435480-F (MtCDFa2)     | GGGGACAAGTTTGTACAAAAAAGCAGGCTAAAAATGATTGAACTAAGGACCCT    |                 |         |
| GW_Medtr3g435480-R (MtCDFa2)     | GGGGACCACTTTGTACAAGAAAGCTGGGTTGACTAACCTCAATTCTCAAACACA   |                 |         |
| GW_Medtr4g082060-F (MtCDFc1)     | GGGGACAAGTTTGTACAAAAAAGCAGGCTTGAGTTGCACACAGATTTTCCT      |                 |         |
| GW_Medtr4g082060-R (MtCDFc1)     | GGGGACCACTTTGTACAAGAAAGCTGGGTTGCAATTCACAACCTAGGTTTCCT    |                 |         |
| GW_Medtr6g027450-F (MtCDFc1_2)   | GGGGACAAGTTTGTACAAAAAAGCAGGCTTGGTGTGTTTTGAGCTGTT         |                 |         |
| GW_Medtr6g027450-R (MtCDFc1_2)   | GGGGACCACTTTGTACAAGAAAGCTGGGTATTACCGGAGCGACAACCTAT       |                 |         |
| GW_Medtr7g086780-F (MtCDFd1_3)   | GGGGACAAGTTTGTACAAAAAAGCAGGCTATGTCTGAGACTCAGAAGGATC      |                 |         |
| GW_Medtr7g086780-R (MtCDFd1_3)   | GGGGACCACTTTGTACAAGAAAGCTGGGTTTATATGCTTTCCTGGATTGTATG    |                 |         |
| Medtr2g059540-F (MtCDF1)         | TGTGGTACAGCATGGGAGACTC                                   |                 | qRT-PCR |
| Medtr2g059540-R (MtCDF1)         | AGACTGATCAACGGTGTAGCA                                    |                 |         |
| Medtr5g041420-F (MtCDFc2_1)      | ACCATCTTGGAGCGTGCAAT                                     |                 |         |
| Medtr5g041420-R (MtCDFc2_1)      | AGCTGCAGGGTTAGAAGCAA                                     |                 |         |
| Medtr5g041530-F (MtCDFc2_4)      | AAGCGCGTGTGATCCCTAA                                      |                 |         |
| Medtr5g041530-R (MtCDFc2_4)      | CCATGAAAAGCTCTCCCCCA                                     |                 |         |
| R108_Medtr6g027460-F (MtCDFd1_1) | ATGGTGGCCGTTACAAACAT                                     |                 |         |
| R108_Medtr6g027460-R (MtCDFd1_1) | TGGACACATTTCCATTCTG                                      |                 |         |
| Medtr2g016030-F (MtCDFe)         | TTCATTAGCATCCTCCTTGTGA                                   |                 |         |
| Medtr2g016030-R (MtCDFe)         | CACATGGGAGGAAAATGGTT                                     |                 |         |
| Medtr3g435480-F (MtCDFa2)        | TTGGTTTCCGCTCATACTC                                      |                 |         |
| Medtr3g435480-R (MtCDFa2)        | CATTTTCGTCGTTGGTGTG                                      |                 |         |

|                                        |                               |  |            |
|----------------------------------------|-------------------------------|--|------------|
| Medtr4g082060-F (MtCDFc1)              | ATCCTCCACTTTGCAACACC          |  |            |
| Medtr4g082060-R (MtCDFc1)              | TTTGAAGCCGTAACCGAAAC          |  |            |
| R108_Medtr5g041380-F (MtCDFc2_3)       | ATCAAGAATGGTGGAGGACT          |  |            |
| R108_Medtr5g041380-R (MtCDFc2_3)       | AGCACGCCTTCAACATATTC          |  |            |
| Medtr5g041400-F (MtCDFc2_2)            | TTGGGAATATGTAGCACCGATA        |  |            |
| Medtr5g041400-R (MtCDFc2_2)            | GGACGTTGAATCGACAGGAC          |  |            |
| Medtr6g027450-F (MtCDFc1_2)            | GCCGAACATTGGCTTGCAAT          |  |            |
| Medtr6g027450-R (MtCDFc1_2)            | TCTCTGGTGTGTTTTCCAAGG         |  |            |
| Medtr7g086780-F (MtCDFd1_3)            | AGATTTTGGAAAGCCAGCTCA         |  |            |
| Medtr7g086780-R (MtCDFd1_3)            | AGAGAAACAAAGGCCAGCAA          |  |            |
| MtFTa1-F                               | GTAGCAGTAGGAATCCACTAGC        |  |            |
| MtFTa1-R                               | ACACTCACTCTCGGTTGATTTCC       |  |            |
| MtFTb1-F                               | ATGAACCCTCTTGTGGTCTG          |  |            |
| MtFTb1-R                               | TGGATTGACTATTTGGGAAG          |  |            |
| MtFTb2-F                               | ACAAATCCTCTTGTTGTTGG          |  |            |
| MtFTb2-R                               | TGAGTTGATTATTTGAGAGG          |  |            |
| MtFTa2-F                               | AAGTGGTAGCAGACCGAATC          |  |            |
| MtFTa2-R                               | CACCACCATTGGTAACAGTC          |  |            |
| MtSOC1a-F                              | GCGTTGTTTCGAGCAAGAAAGAATCAGGC |  |            |
| MtSOC1a-R                              | GGGGCTGCTTAGAGAGCCTGGCATT     |  |            |
| MtCOLa-F                               | GGTTGTGAGGTGGAGGAAGA          |  |            |
| MtCOLa-R                               | CAACAAAAGCCATGAAGCTG          |  |            |
| MtCOLb-F                               | CCGAACACGAACATGAACAC          |  |            |
| MtCOLb-R                               | CATCCATCGACGGTGAAGA           |  |            |
| MtCOLc-F                               | ATCTTCCTCGATGGACGTTG          |  |            |
| MtCOLc-R                               | GTCCCGTAACCACAGTTTGA          |  |            |
| MtCOLd-F                               | GCCGATGATGAATCACAACCTCAG      |  |            |
| MtCOLd-R                               | GTGAAGATGACGAAACGCTATG        |  |            |
| MtCOLh-F                               | GAATAGAGGGGATGCCATGTT         |  |            |
| MtCOLh-R                               | CAAATCGCCCTCTCACTCTC          |  |            |
| Medtr2g059540_genotyping-F (MtCDF1)    | TCGCTACTGGACCAAAGGTG          |  | Genotyping |
| Medtr2g059540_genotyping-R (MtCDF1)    | ATCACCGAGTCTCCATGCTG          |  |            |
| Medtr5g041420_genotyping-F (MtCDFc2_1) | AACGCTTTTTGGGAGAACGA          |  |            |
| Medtr5g041420_genotyping-R (MtCDFc2_1) | TGGAACAACCTGGTCTGGTTTC        |  |            |
| Medtr5g041530_genotyping-F (MtCDFc2_4) | ACCCAAAATCTCCCTCGTCG          |  |            |
| Medtr5g041530_genotyping-R (MtCDFc2_4) | CCATGAAAAGCTCTCCCCCA          |  |            |
| Medtr6g012450_genotyping-F (MtCDFb2)   | CCGTGTCCCCGTTGTTATAG          |  |            |
| Medtr6g012450_genotyping-R (MtCDFb2)   | GGCGGTGGTTGACTTGAGA           |  |            |
| Medtr6g012450_genotyping-R2 (MtCDFb2)  | AATCGCATCTGCCTTATCGT          |  |            |
| Medtr6g027460_genotyping-F (MtCDFd1_1) | CAATGTCAATCAACCTCGGCA         |  |            |

|                                        |                         |
|----------------------------------------|-------------------------|
| Medtr6g027460_genotyping-R (MtCDFd1_1) | TGGACACATTTCCATTCTG     |
| Medtr6g027460-F (MtCDFd1_1)            | GCTACCCTGCATCTTCATGGA   |
| Medtr6g027460-R (MtCDFd1_1)            | GCATTGCAGTAGGATCAATGCC  |
| Medtr7g010950_genotyping-F (MtCDFb1)   | TCGTGTTGGAGATGTTGTTGT   |
| Medtr7g010950_genotyping-F1 (MtCDFb1)  | GGAGGTTTCATGTTGGAGATG   |
| Medtr7g010950_genotyping-F2 (MtCDFb1)  | AGTGAAGAACAAGGCGAGGA    |
| Medtr7g010950_genotyping-R (MtCDFb1)   | CCGATGGTTTTTCTCCCAATGT  |
| Medtr7g010950_genotyping-R1 (MtCDFb1)  | CGGAATCACGTTGAGTTTCA    |
| Medtr7g010950_genotyping-R2 (MtCDFb1)  | TGAAGCGACCTAGACAAATGC   |
| Medtr2g016030_genotyping-F (MtCDFe)    | CGGAAAGTTGTCTCTACGAAGC  |
| Medtr2g016030_genotyping-R (MtCDFe)    | TGAATAACCACCTGAGGTCTTCC |
| Medtr3g435480_genotyping-F (MtCDFa2)   | TGGTAGAGTTCTCAACTTTGGGT |
| Medtr3g435480_genotyping-R (MtCDFa2)   | ATTGCGCCAGAACTCCAAGT    |
| Medtr4g082060_genotyping-F (MtCDFc1)   | ACTGATCATCCCTGCCAACG    |
| Medtr4g082060_genotyping-R (MtCDFc1)   | ACGAGGCTGGTTGACATTGT    |
| Medtr5g041380_genotyping-F (MtCDFc2_3) | ACAACACCGATGTTCTTACCA   |
| Medtr5g041380_genotyping-R (MtCDFc2_3) | CCTCTGTGTTTTGTTTGGAGGC  |
| Medtr5g041400_genotyping-F (MtCDFc2_2) | ACACGCAACACCGACGATTA    |
| Medtr5g041400_genotyping-R (MtCDFc2_2) | GAGATTTTGTCTTGC GGCG    |
| Medtr6g027450_genotyping-F (MtCDFc1_2) | CCCGACAAAATTGTTCAATGTCC |
| Medtr6g027450_genotyping-R (MtCDFc1_2) | GGTTGAAATCCACCGGAAGC    |
| Medtr7g086780_genotyping-F (MtCDFd1_3) | CGATGCAACAGTTGGGACAC    |
| Medtr7g086780_genotyping-R (MtCDFd1_3) | TCGAACCGGAACACACTTGT    |
| Medtr8g044220_genotyping-F (MtCDFd2)   | GATGCAGTACCTGTCATACACAT |
| Medtr8g044220_genotyping-R (MtCDFd2)   | AGAAGAGCTGGAAGAGTTCTCA  |
| Tnt1-F                                 | ACAGTGCTACCTCCTCTGGATG  |
| Tnt1-R                                 | CAGTGAACGAGCAGAACCTGTG  |

## Supplementary References

- Imaizumi, T., Schultz, T. F., Harmon, F. G., Ho, L. A., and Kay, S. A. (2005). FKF1 F-box protein mediates cyclic degradation of a repressor of *CONSTANS* in *Arabidopsis*. *Science* 309, 293–297. doi:10.1126/science.1110586.
- Ridge, S., Sussmilch, F. C., Hecht, V., Schoor, K. Vander, Lee, R., Aubert, G., et al. (2016). Identification of *LATE BLOOMER2* as a *CYCLING DOF FACTOR* homolog reveals conserved and divergent features of the flowering response to photoperiod in pea. *The Plant Cell* 28, 2545–2559. doi:10.1105/tpc.15.01011.
- Thomson, G., Taylor, J., and Putterill, J. (2019). The transcriptomic response to a short day to long day shift in leaves of the reference legume *Medicago truncatula*. *PeerJ* 7, e6626. doi:10.7717/peerj.6626.
